# Supplementary material for: IgE is associated with exacerbations and lung function decline in COPD
Source: Springer Nature journal article supplement (doi:10.1186/s12931-021-01847-0), 2022-01-04

## **IgE is associated with exacerbations and lung function decline in COPD**

Marek Lommatzsch <sup>a</sup>, Timotheus Speer <sup>b</sup>, Christian Herr <sup>c</sup>, Rudolf A. Jörres <sup>d</sup>, Henrik Watz <sup>e</sup>, Achim Müller <sup>f</sup>, Tobias Welte <sup>g</sup>, Claus F. Vogelmeier <sup>h</sup>, and Robert Bals <sup>c§</sup>, for the COSYCONET study group

## **Additional File 1**

**Table S1**

Spirometric grades and clinical groups according to GOLD.

| <b>Spirometric grades</b> | <b>No. of patients</b> | <b>Percentage</b> |
|---------------------------|------------------------|-------------------|
| 0/1                       | 388                    | 17,0              |
| 2                         | 954                    | 41,8              |
| 3                         | 738                    | 32,4              |
| 4                         | 193                    | 8,5               |
| Missing data              | 7                      | 0,3               |
| <b>Groups</b>             | <b>No. of patients</b> | <b>Percentage</b> |
| A                         | 256                    | 11,2              |
| B                         | 1194                   | 52,4              |
| C                         | 37                     | 1,6               |
| D                         | 779                    | 34,2              |
| Missing data              | 14                     | 0,6               |

**Table S2A**

Characteristics of patients with normal and elevated total serum IgE levels (shown are mean values). Analysis is based on 2280 patients.

|                                      | IgE < 100 IU/l | IgE > 100 IU/l | p-value |
|--------------------------------------|----------------|----------------|---------|
| <b>Gender: male</b>                  | 848 (54.08%)   | 490 (68.82%)   | < 0.001 |
| <b>Gender: female</b>                | 720 (45.92%)   | 222 (31.18%)   |         |
| <b>Weight (kg)</b>                   | 78.81          | 79.54          | NS      |
| <b>Height (kg)</b>                   | 169.92         | 171.83         | < 0.001 |
| <b>BMI</b>                           | 27.18          | 26.85          | NS      |
| <b>Packyears</b>                     | 47.87          | 49.72          | NS      |
| <b>Age (years)</b>                   | 64.74          | 64.95          | NS      |
| <b>FEV<sub>1</sub> (% predicted)</b> | 0.60           | 0.60           | NS      |
| <b>ITGV (% predicted)</b>            | 145.28         | 140.85         | 0.009   |
| <b>DLCO (% predicted)</b>            | 54.35          | 57.43          | NS      |
| <b>SGRQ</b>                          | 42.41          | 43.13          | NS      |
| <b>CAT score</b>                     | 17.91          | 18.33          | NS      |

**Table S2B**

Characteristics of patients with normal and elevated allergen-specific serum IgE levels (SX1)(shown are mean values). Analysis is based on 2280 patients.

|                                      | SX1 < 0.35 IU/l | SX1 > 0.35 IU/l | p-value |
|--------------------------------------|-----------------|-----------------|---------|
| <b>Gender: male</b>                  | 978 (57.56%)    | 350 (62.06%)    | < 0.001 |
| <b>Gender: female</b>                | 721 (42.44%)    | 214 (37.94%)    |         |
| <b>Weight (kg)</b>                   | 78.84           | 79.69           | NS      |
| <b>Height (kg)</b>                   | 170.24          | 171.39          | < 0.001 |
| <b>BMI</b>                           | 27.09           | 27.04           | NS      |
| <b>Packyears</b>                     | 48.92           | 47.23           | NS      |
| <b>Age (years)</b>                   | 64.97           | 64.23           | NS      |
| <b>FEV<sub>1</sub> (% predicted)</b> | 0.59            | 0.64            | NS      |
| <b>ITGV (% predicted)</b>            | 145.64          | 138.44          | 0.009   |
| <b>DLCO (% predicted)</b>            | 53.74           | 60.03           | NS      |
| <b>SGRQ</b>                          | 43.05           | 41.43           | NS      |
| <b>CAT score</b>                     | 18.15           | 17.70           | NS      |

**Table S3**

Blood eosinophil data (visit 1) were available from 594 patients. In this subgroup, there was a weak correlation between eosinophil percentages ( $r = 0.09$ ,  $p < 0.05$ ) and concentrations ( $r = 0.08$ ,  $p < 0.05$ ) and total IgE. There was no correlation between SX1 levels and eosinophils (data not shown). Patients with elevated total IgE or allergen-specific IgE (SX1) displayed slightly higher blood eosinophil percentages and cell counts, as compared to patients with normal IgE values:

|                      | Normal IgE (< 100 IU/ml) |                     |      |                    | Elevated IgE ( $\geq$ 100 IU/ml)  |                     |      |                    |
|----------------------|--------------------------|---------------------|------|--------------------|-----------------------------------|---------------------|------|--------------------|
| <b>Eosinophils</b>   | Median                   | Interquartile Range | Mean | Standard deviation | Median                            | Interquartile Range | Mean | Standard deviation |
| cells/ $\mu$ l blood | 160                      | 140                 | 180  | 150                | 160                               | 180                 | 220  | 180                |
| % of all leukocytes  | 2.00                     | 2.00                | 2.26 | 1.85               | 2.00                              | 2.33                | 2.78 | 2.33               |
|                      | Normal SX1 (<0.35 IU/ml) |                     |      |                    | Elevated SX1 ( $\geq$ 0.35 IU/ml) |                     |      |                    |
| cells/ $\mu$ l blood | 140                      | 150                 | 180  | 160                | 160                               | 150                 | 210  | 180                |
| % of all leukocytes  | 2.00                     | 2.00                | 2.35 | 1.96               | 2.00                              | 1.90                | 2.65 | 2.24               |

Shown are blood eosinophil concentrations (cells /  $\mu$ l blood) and percentages (% of all blood leukocytes) of patients with normal and elevated total IgE and allergen-specific serum IgE levels (SX1). All differences were statistically significant ( $p < 0.05$ ).

**Table S4A**

Logistic regression analyses for the association between tertiles of total serum IgE at baseline and risk of declining FEV<sub>1</sub> (group C) during follow-up. Tertiles of total IgE: tertile 1: ≤ 24.2 IU/ml, tertile 2: 24.3 - 91.5 IU/ml, tertile 3: > 91.5 IU/ml. The minimal sufficient adjustment sets for estimating the total effect of total IgE on declining FEV<sub>1</sub> comprises age and gender (according to DAG diagram analyses, [www.dagitty.net](http://www.dagitty.net)). Therefore, we calculated logistic regression models adjusting for age and gender (model 1) and additional models with more potential confounders (model 2: adjusted for age, gender, BMI, initial FEV<sub>1</sub> % predicted, smoking status; model 3: adjusted for age, gender, BMI, initial FEV<sub>1</sub> % predicted, smoking status, history of asthma, history of allergy).

| Model          | Tertile of IgE | OR        | 95 % CI   | P     |
|----------------|----------------|-----------|-----------|-------|
| <b>Crude</b>   | 1              | Reference |           |       |
|                | 2              | 1.01      | 0.80-1.29 | 0.910 |
|                | 3              | 1.57      | 1.09-2.26 | 0.015 |
| <b>Model 1</b> | 1              | Reference |           |       |
|                | 2              | 1.01      | 0.79-1.29 | 0.936 |
|                | 3              | 1.58      | 1.09-2.27 | 0.015 |
| <b>Model 2</b> | 1              | Reference |           |       |
|                | 2              | 1.01      | 0.80-1.29 | 0.912 |
|                | 3              | 1.59      | 1.10-2.30 | 0.013 |
| <b>Model 3</b> | 1              | Reference |           |       |
|                | 2              | 1.00      | 0.78-1.28 | 0.999 |
|                | 3              | 1.62      | 1.12-2.34 | 0.011 |

Model 1: Adjusted for age, gender.

Model 2: Adjusted for age, gender, BMI, initial FEV<sub>1</sub> % predicted, smoking status.

Model 3: Adjusted for age, gender, BMI, initial FEV<sub>1</sub> % predicted, smoking status, history of asthma, history of allergy.

**Table S4B**

Logistic regression analyses for the association between tertiles of allergen-specific IgE (SX1) at baseline and risk of declining FEV<sub>1</sub> (group C) during follow-up. Tertiles of SX-1: tertile 1: ≤ 0.08 IU/ml, tertile 2: 0.09 - 0.19 IU/ml, tertile 3: > 0.19 IU/ml. The minimal sufficient adjustment sets for estimating the total effect of SX1 on declining FEV<sub>1</sub> comprises age and gender (according to DAG diagram analyses, [www.dagitty.net](http://www.dagitty.net)). Therefore, we calculated logistic regression models adjusting for age and gender (model 1) and additional models with more potential confounders (model 2: adjusted for age, gender, BMI, initial FEV<sub>1</sub> % predicted, smoking status; model 3: adjusted for age, gender, BMI, initial FEV<sub>1</sub> % predicted, smoking status, history of asthma, history of allergy).

| Model          | Tertile of SX1 | OR        | 95% CI    | P     |
|----------------|----------------|-----------|-----------|-------|
| <b>Crude</b>   | 1              | Reference |           |       |
|                | 2              | 1.08      | 0.78-1.49 | 0.647 |
|                | 3              | 2.03      | 1.27-3.23 | 0.003 |
| <b>Model 1</b> | 1              | Reference |           |       |
|                | 2              | 1.07      | 0.78-1.48 | 0.670 |
|                | 3              | 1.97      | 1.23-3.15 | 0.005 |
| <b>Model 2</b> | 1              | Reference |           |       |
|                | 2              | 1.11      | 0.80-1.55 | 0.522 |
|                | 3              | 2.10      | 1.30-3.38 | 0.002 |
| <b>Model 3</b> | 1              | Reference |           |       |
|                | 2              | 1.13      | 0.81-1.58 | 0.484 |
|                | 3              | 2.15      | 1.32-3.51 | 0.002 |

Model 1: Adjusted for age, gender.

Model 2: Adjusted for age, gender, BMI, initial FEV<sub>1</sub>%, smoking status.

Model 3: Adjusted for age, gender, BMI, initial FEV<sub>1</sub>%, smoking status, history of asthma, history of allergy.

**Fig. S1**

Correlation as measured using Spearman's correlation coefficient ( $r$ ) between total IgE levels in serum (x-axis) and allergen-specific IgE in serum (y-axis, logarithmic scale) as measured using the SX assay, in the total group of 2280 patients. \*\*\* =  $p < 0.001$ .

**Fig. S2**

Total and allergen-specific IgE (SX) in serum according to spirometric GOLD grades 1-4. The percentage of patients with  $\geq 100$  IU/l total IgE (upper panel) or  $\geq 0.35$  IU/l allergen-specific IgE (lower panel) are shown in yellow (with specific percentages), for males and females with COPD. There was a weak correlation between allergen-specific IgE (SX1) and FEV1 (% predicted), in males ( $r = 0.09$ ,  $p = 0.001$ ) and females ( $r = 0.07$ ,  $p = 0.033$ ). Accordingly, the percentage of patients with elevated allergen-specific IgE (SX1) levels decreased from spirometric GOLD grades 1 to 4. There were weak correlations between allergen-specific IgE (SX1) and DLCO (males:  $r = 0.11$ ,  $p < 0.001$ ; females:  $r = 0.12$ ,  $p < 0.001$ ), RV (males:  $r = -0.06$ ,  $p = 0.039$ ; females:  $r = -0.11$ ,  $p = 0.001$ ) and ITGV (males:  $r = -0.06$ ,  $p = 0.039$ ; females:  $r = -0.09$ ,  $p = 0.007$ ).

**Fig. S3**

Restricted cubic splines to visualize the non-linear association between total IgE and the exacerbation history. Three knots of total or allergen-specific IgE were placed corresponding to the 10th, 50th, and 90th percentile of the IgE levels, respectively. Increasing total IgE levels were associated with a higher risk of exacerbations in men ( $p = 0.004$ ), but not in women ( $p = 0.135$ ) with COPD.

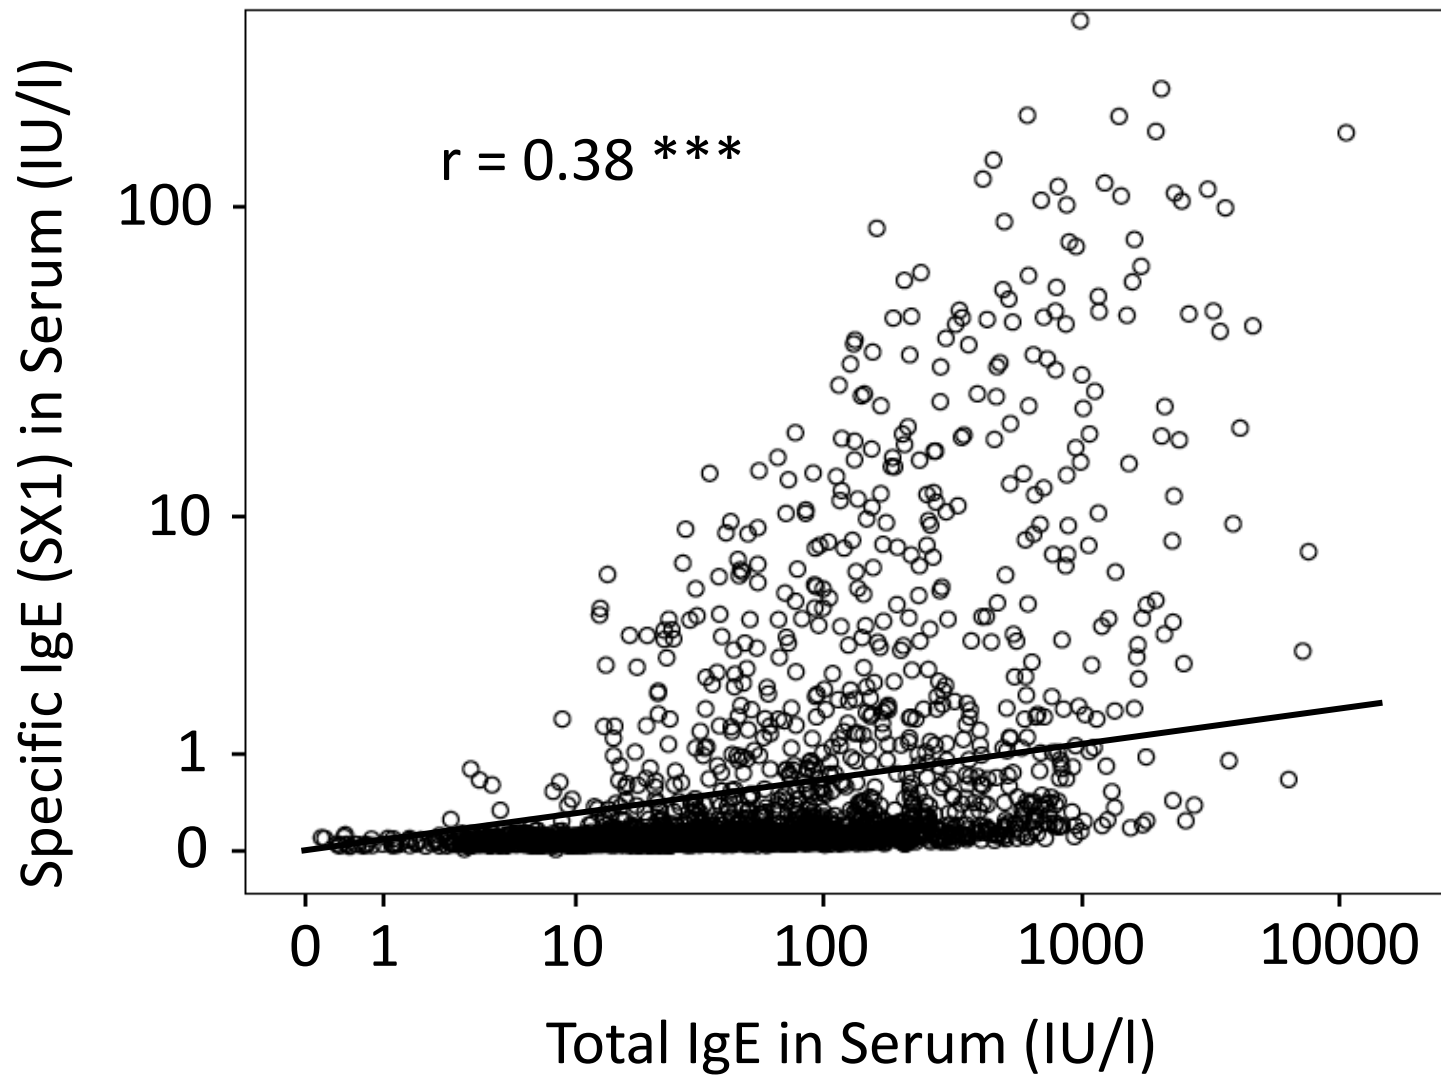

Fig. S1



Spirometric  
GOLD grades

1

2

3

4

Males

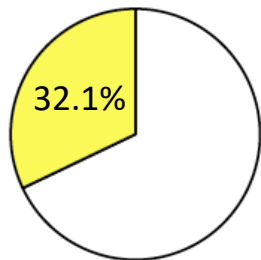

32.1%

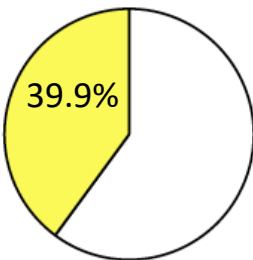

39.9%

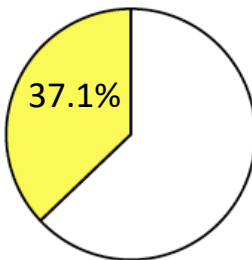

37.1%

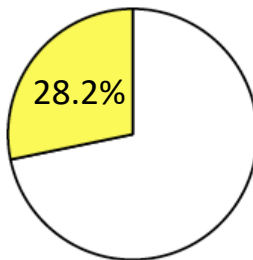

28.2%

Females

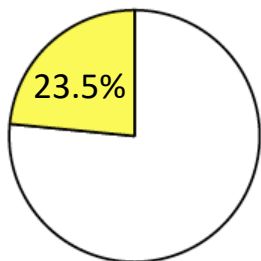

23.5%

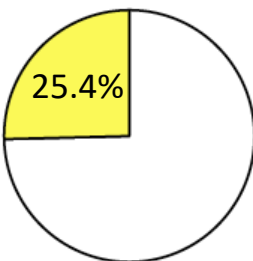

25.4%

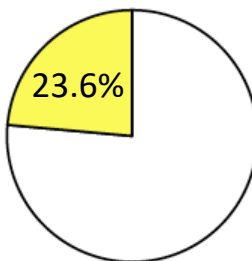

23.6%

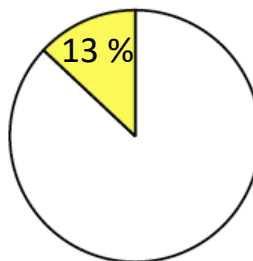

13 %

Total IgE  
in Serum

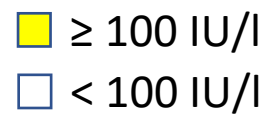

Males

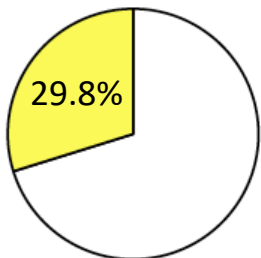

29.8%

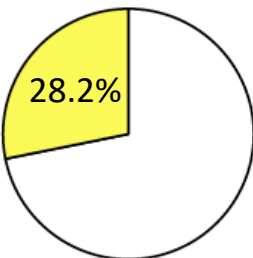

28.2%

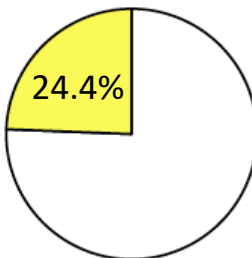

24.4%

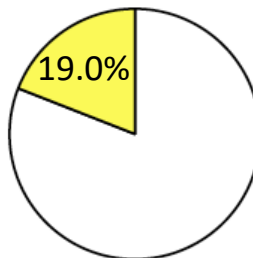

19.0%

Females

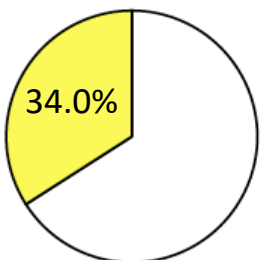

34.0%

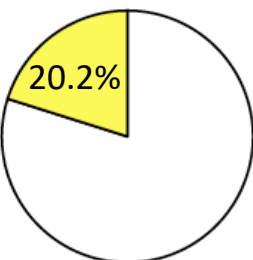

20.2%

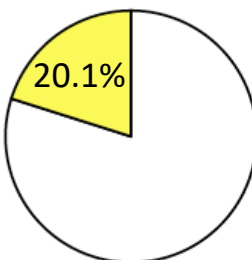

20.1%

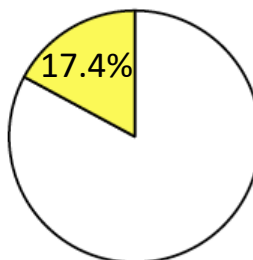

17.4%

Specific IgE  
in Serum (SX-1)

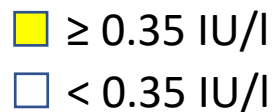

## Males

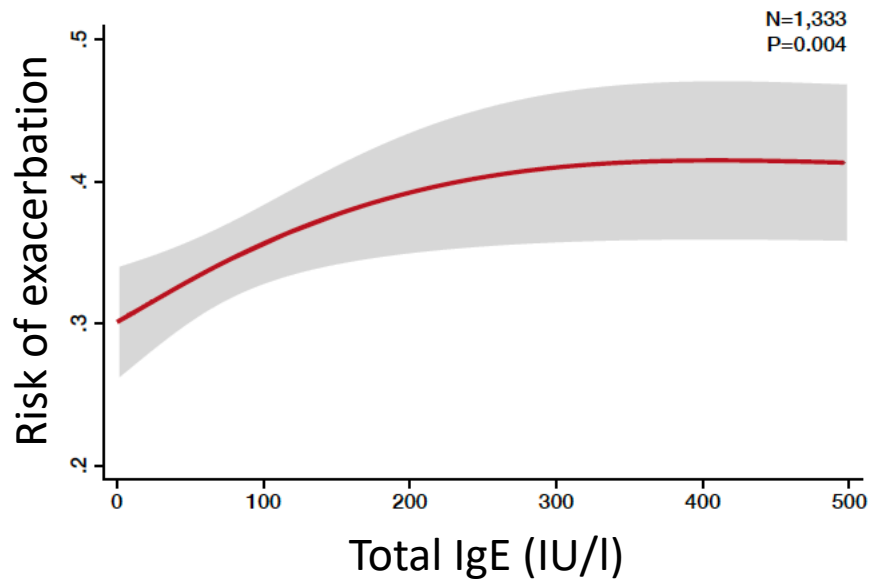

## Females

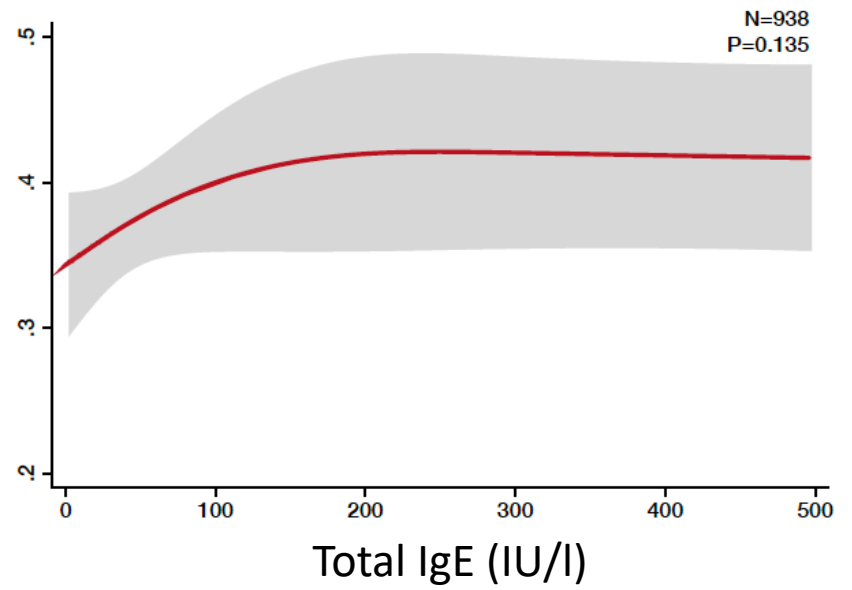

Supplement: MOESM1 [file 19999496]
